# Supplementary material for: Characterization of Reproductive Dormancy in Male Drosophila melanogaster
Source: PubMed Central journal article supplement (PMC5121231; doi:10.3389/fphys.2016.00572), 2016-11-24
Supplement: DataSheet1.pdf [file DataSheet1.pdf]

*Supplementary Material*

**Characterization of reproductive diapause in male *Drosophila melanogaster***

Olga I. Kubrak, Lucie Kučerová, Ulrich Theopold, Sören Nylin, and Dick R. Nässel\*

\* **Correspondence:** Corresponding Author: [dnassel@zoologi.su.se](mailto:dnassel@zoologi.su.se)

## Supplementary figures

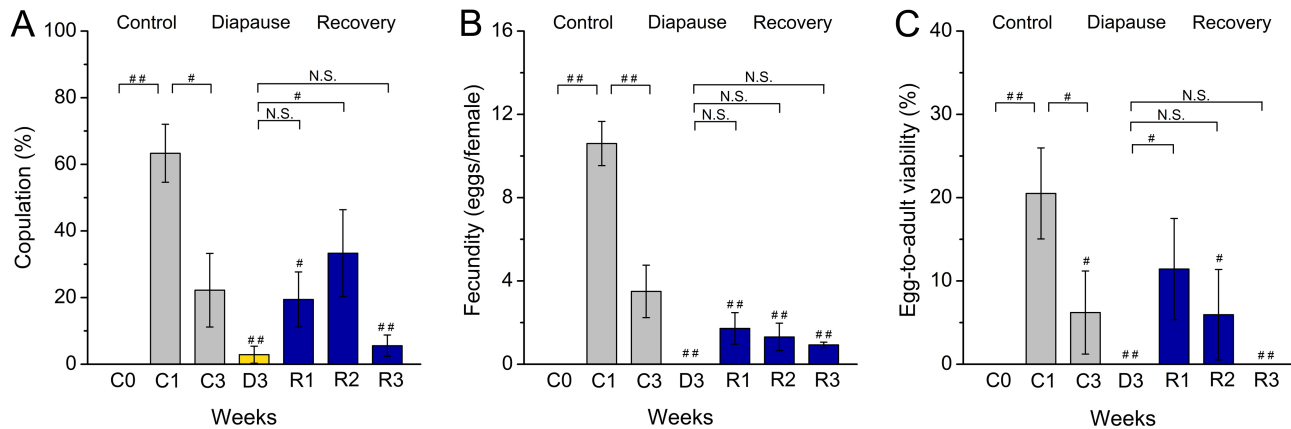

**Fig. S1.** Diapause conditions affect copulation, fecundity and egg to adult viability. All data are shown for crossing between identical partners (pairing virgin female - unmated male of the same condition). Newly eclosed flies (C0) of either sex do not show any copulation behaviour and there is no oviposition or progeny. **A.** Three week diapausing flies (both, females and males) (D3) display strong reduction in copulation in comparison to the 1-week control flies, but copulation increases after recovery from diapause (R1) to the level of 3-week control (C3) flies. **B.** Fecundity after copulation of identical partners is negligible for diapausing females (D3) (crossed with diapausing males). Post-diapausing, recovered (R1-R3) females after crossing with recovered males (R1-R3) display lower fecundity than control flies (C1-C3). **C** Although female flies that recovered from diapause for 1-3 weeks (R1-R3) and then crossed with recovered male partners (R1-R3) lay fewer eggs than the controls (C1), the egg-to-adult viability of eggs produced by R1 females is similar to those of the control C1 flies. Data are shown as mean  $\pm$  S.E.M, and average 6 independent replicates with 5-7 fly couples in each replicate,  $n = 30-42$  fly couples (male and female). Data significantly different from the control C1 flies or between groups is indicated with  $##p < 0.01$ ,  $###p < 0.001$  (Kruskal–Wallis test followed by pairwise comparisons using Wilcoxon rank sum test). N.S. Not significant. See Fig 3 for the same parameters after crossing of C0-R3 flies with a control (C1) partner.

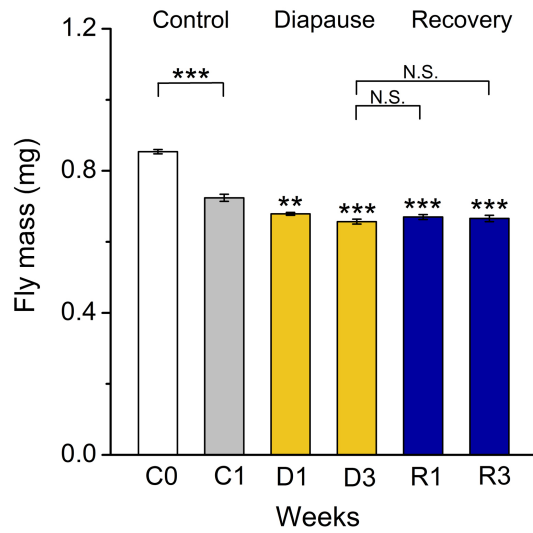

**Fig. S2.** The body mass of diapausing flies decreases. Fly wet mass (mg) of unmated males of *D. melanogaster*, including 3-6 h old flies (C0), and those kept in normal conditions for 1 or 3 weeks (C1 and C3), or in diapause conditions for 3 weeks (D3) and thereafter recovery for 1-3 weeks (R1-R3). Data significantly different from the controls (C1) are indicated with \* $p < 0.05$ , \*\* $p < 0.01$ , \*\*\* $p < 0.001$  (ANOVA followed with Tukey test). Data represent 6 replicates with 6-15 flies in each replicate,  $n = 36-90$  flies.

## Supplementary table

Table S1. Primers for qPCR (all displayed 5'–3')

| Primer                           | Sequence                                                      | Reference           |
|----------------------------------|---------------------------------------------------------------|---------------------|
| <i>rp49 F</i><br><i>rp49 R</i>   | ATC GGT TAC GGA TCG AAC AA<br>GAC AAT CTC CTT GCG CTT CT      | Kubrak et al., 2014 |
| <i>Akh F</i><br><i>Akh R</i>     | AGA CCT CCA ACG AAA TGC TG<br>GTG CTT GCA GTC CAG AAA GAG     | Hentze et al., 2015 |
| <i>pepck F</i><br><i>pepck R</i> | TCA ATG GCG AAT CCT GCT AC<br>TCC TTC ACG TCC ACC TTA TCC     | Hentze et al., 2015 |
| <i>bmm F</i><br><i>bmm R</i>     | GGT CCC TTC AGT CCC TCC TT<br>GCT TGT GAG CAT CGT CTG GT      | Hentze et al., 2015 |
| <i>NLaz F</i><br><i>NLaz R</i>   | GGT GAA TGC GGC CAT CAA TC<br>AAT GGC TGC GTC GGG TAA AA      | This study          |
| <i>TotA F</i><br><i>TotA R</i>   | AAT TCT TCA ACT GCT CTT ATG TGC<br>TTT GGA GTC ATC GTC CTG GG | This study          |
| <i>soti</i>                      | TCA GCG AGG CGA GTA CTT TG<br>TCC GAG GTC CAA GAG AGG TT      | This study          |
| <i>twe</i>                       | GCA AAT AGA TCA GGA TGG CGA G<br>CTC CTG CAC GGC TGA TTT TC   | This study          |
| <i>Drs</i>                       | GCA CTC TGA TTC AAA ACC GA<br>GGT CTC GTT GTC CCA GAC         | This study          |

Unless otherwise stated primers were designed using free online software Primer Blast, BLAST database from NIH, Bethesda, Maryland, USA (<http://blast.ncbi.nlm.gov/Blast.cgi>). For the rest of the primers the corresponding references are shown.

## References to primers

Hentze, J.L., Carlsson, M.A., Kondo, S., Nässel, D.R., Rewitz, K.F. (2015) The neuropeptide allostatin A regulates metabolism and feeding decisions in *Drosophila*. *Sci Rep* 5,11680.

Kubrak, O.I., Kucerova, L., Theopold, U., and Nässel, D.R. (2014). The Sleeping Beauty: How Reproductive Diapause Affects Hormone Signaling, Metabolism, Immune Response and Somatic Maintenance in *Drosophila melanogaster*. *PLoS ONE* 9, e113051.
